# Supplementary material
Source: PubMed Central journal article supplement (PMC5435423)
Supplement: supp_tpc.16.00669_TPC2016-00669-RAR2_Supplemental_Data.pdf [file supp_tpc.16.00669_TPC2016-00669-RAR2_Supplemental_Data.pdf]

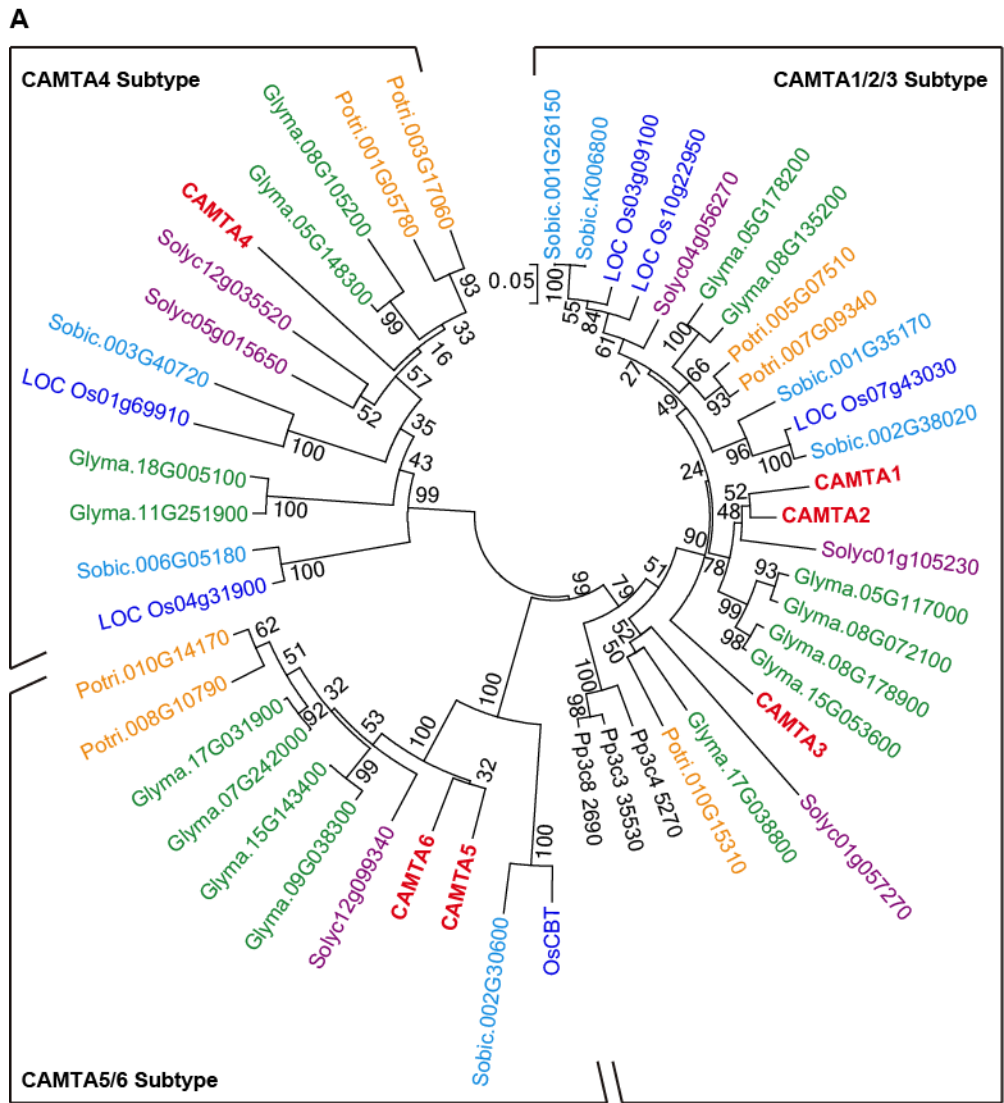

**Supplemental Figure 1.** Phylogenetic tree of CAMTA family proteins. (Supports Figure 1.)

**(A)** Phylogenetic tree constructed according to the CG1 DNA-binding domains of the CAMTA transcription factors in *Arabidopsis thaliana* (red), *Glycine max* (green), *Solanum lycopersicum* (purple), *Populus trichocarpa* (orange), *Oryza sativa* (blue), *Sorghum bicolor* (aqua) and *Physcomitrella patens* (black). A total of 45 candidate peptide sequences were identified in the Phytozome v11.0 genomic database (<http://www.phytozome.net/>).

[illegible]

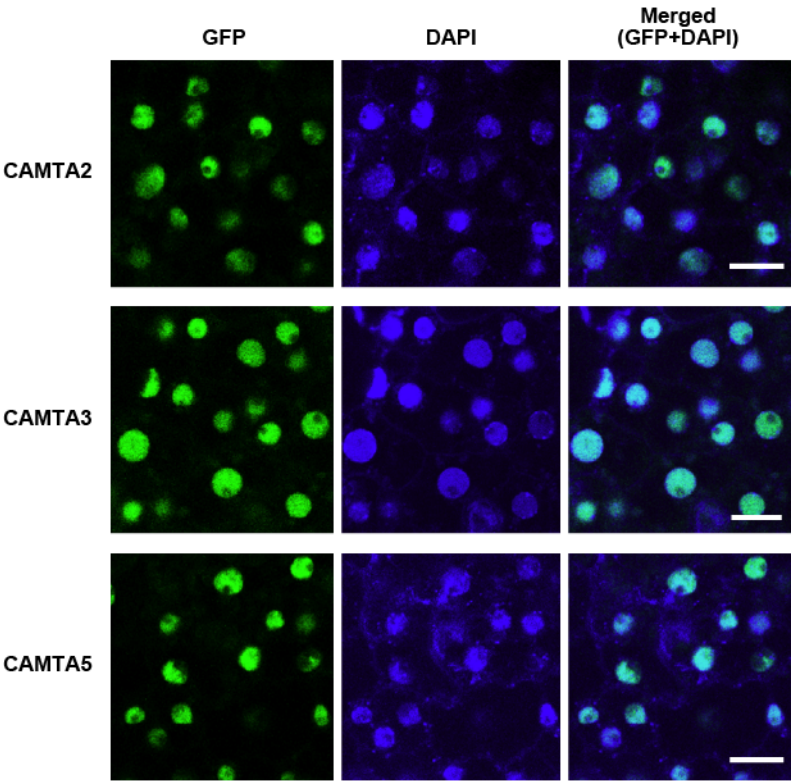

**Supplemental Figure 2.** Subcellular localization of CAMTA proteins in transgenic plants.

(Supports Figure 1.)

Expression of *CAMTA-GFP* fusion genes driven by the CaMV 35S promoter was observed in 1-week-old seedlings. Rosette leaves of *CAMTA2*-, *CAMTA3*- and *CAMTA5-GFP* plants are shown. GFP fluorescence, DAPI fluorescence and differential interference contrast (DIC) images are presented. Bars = 10  $\mu$ m.

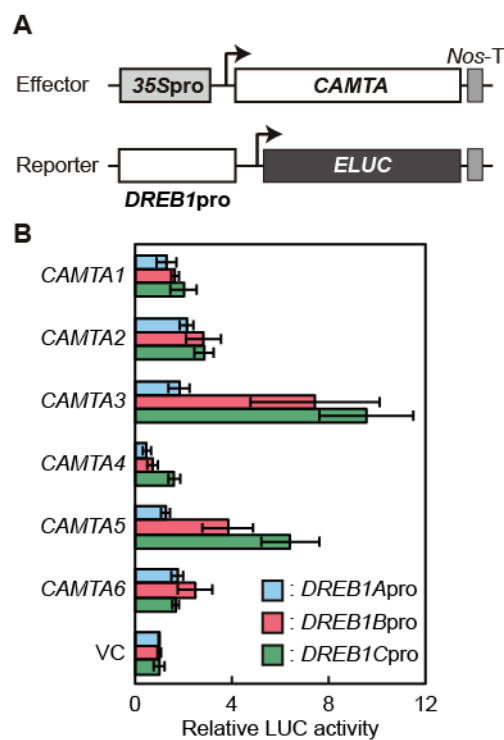

**Supplemental Figure 3.** Transactivation analyses of the CAMTA family proteins using each 1-kb *DREB1* promoter.

(Supports Figure 2.)

**(A)** Schematic diagrams of the effector and reporter constructs used in transactivation analyses. The effector constructs contained the CaMV 35S promoter fused to the CAMTA1-6 coding sequences. Nos-T indicates the polyadenylation signal of the nopaline synthase gene. The reporter constructs contained the *emerald LUC* gene fused to a 1-kb fragment of the *DREB1A*, *DREB1B* or *DREB1C* promoter.

**(B)** Transactivation activities of the CAMTA family proteins in Arabidopsis mesophyll protoplasts. The relative activity indicates the fold change in expression compared with the expression in the vector control. The error bars indicate the standard deviation of three biological replicates.

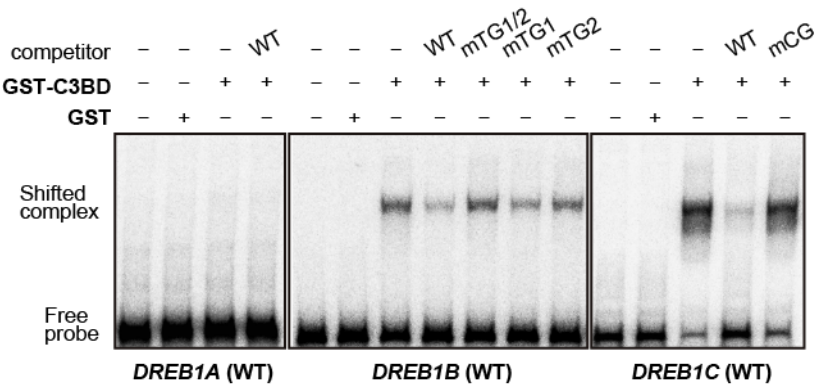

**Supplemental Figure 4.** Electrophoresis mobility shift assay of binding of the recombinant CAMTA3BD protein to the *DREB1* promoters.  
(Supports Figure 2.)

Radioactive probes of *DREB1A*, *DREB1B* and *DREB1C* were incubated with or without a 1,000-fold excess of competitors in the presence of the recombinant CAMTA3BD protein (GST-C3BD). The DNA fragments of probes and competitors were the same as those in Figure 2C.

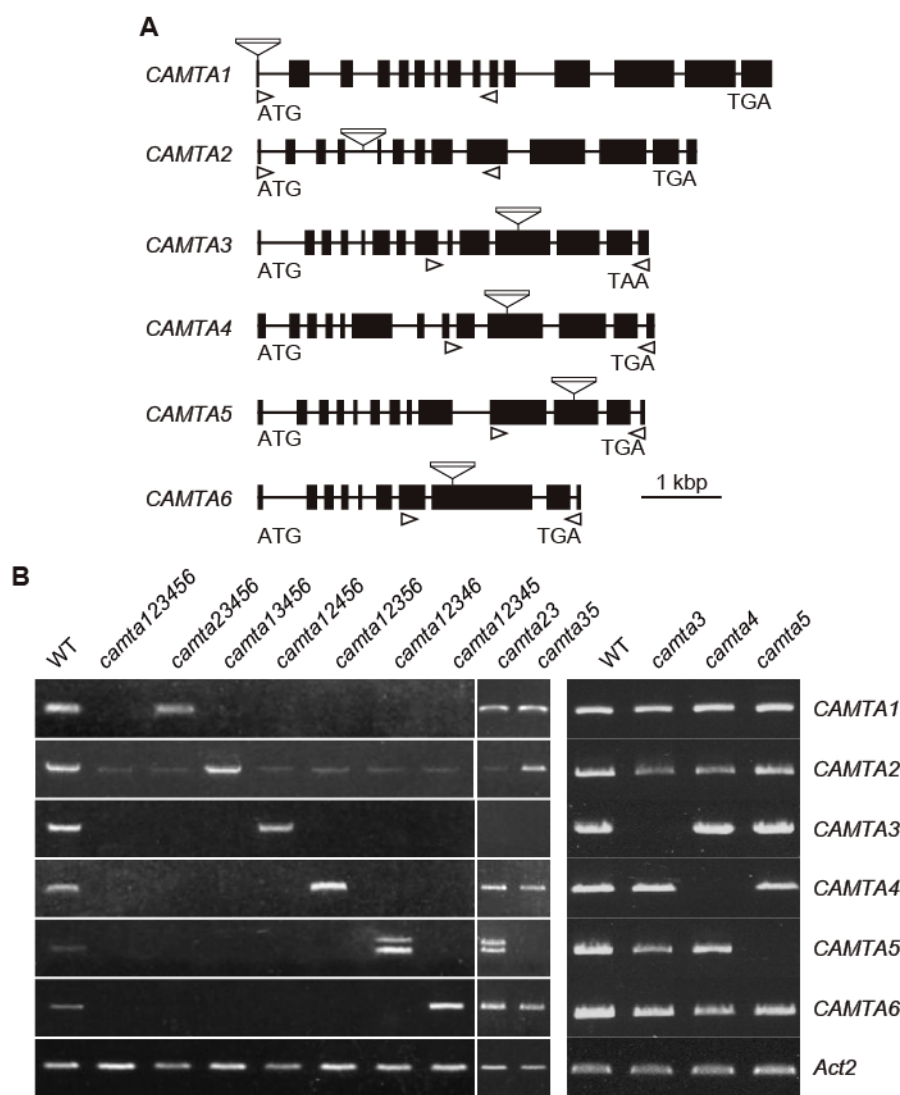

**Supplemental Figure 5.** Construction of mutants of the *CAMTA* family genes.  
(Supports Figure 3.)

**(A)** Schematic diagrams of the *CAMTA* genes. The exons (boxes) and introns (line) are indicated. The positions of T-DNA insertions are shown. The arrowheads indicate the RT-PCR primer positions.

**(B)** Expression of the *CAMTA* genes in the WT and mutant plants used in this study, as determined by RT-PCR.

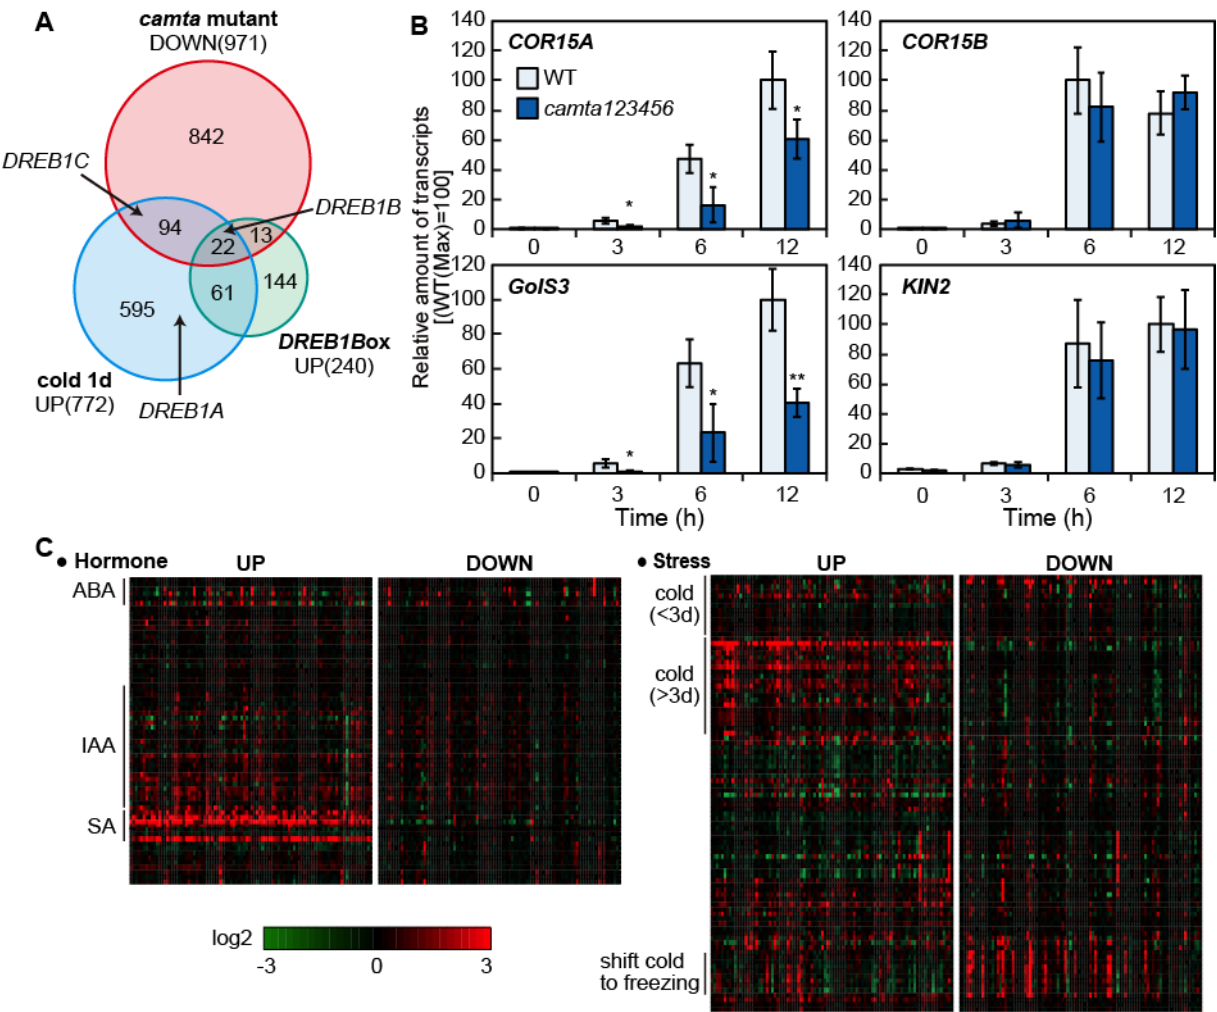

**Supplemental Figure 6.** Transcriptome analysis of sextuple mutants of the *CAMTA* family genes grown in soil pots. (Supports Figure 3.)

**(A)** Venn diagram comparing the down-regulated genes in the *camta* mutants with cold-inducible and DREB1B-downstream genes. The total number of genes in each group is shown in parentheses.

**(B)** Transcript levels of the DREB1-downstream genes whose expression was down-regulated or unchanged in the *camta* sextuple mutant under cold stress conditions. Three-week-old plants grown in soil pots under a 12-h light/12-h dark cycle at 22°C were immediately cooled to 4°C beginning at ZT2. The transcript level of each gene in the plants treated for the indicated duration (0, 3, 6, or 12 h) was measured by RT-qPCR. The values represent the average of three replicates, and the error bars indicate the SD. The maximum expression level of each gene in the WT plants was set to 100. The asterisks indicate significant differences (\* $p < 0.05$  and \*\* $p < 0.01$  according to Student's t-test) in the expression of each gene compared with that in the WT plants at each time point in three biological replicates using the plants sampled at different times.

**(C)** Responses of the up- and down-regulated genes in the mutant plants to hormone and stress treatments. The expression ratios of the top 100 up-regulated genes in each plant (x-axes, from left to right) in response to the various hormone and stress treatments (y-axes) are displayed as heat maps.

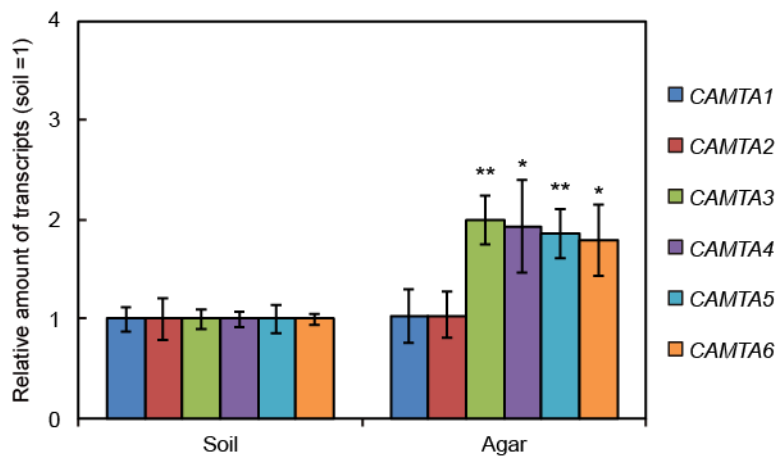

**Supplemental Figure 7.** Expression levels of the *CAMTA* family genes in *Arabidopsis* grown in soil pots or on agar plates.  
(Supports Figure 4.)

The transcript level of each mRNA in 3-week-old Col-0 plants grown in soil pots or on agar plates at ZT2 under a 12-h light/12-h dark cycle at 22°C was measured by RT-qPCR. The values represent the average of three technical replicates, and the error bars indicate the SD. The expression level of each gene in the plants grown in soil pots was set to 1. The asterisks indicate significant differences (\* $p < 0.05$  and \*\* $p < 0.01$  according to Student's t-test) in the expression of each gene in the plants grown on agar plates, compared with that in the plants grown in soil pots in three biological replicates using the plants sampled at different times.

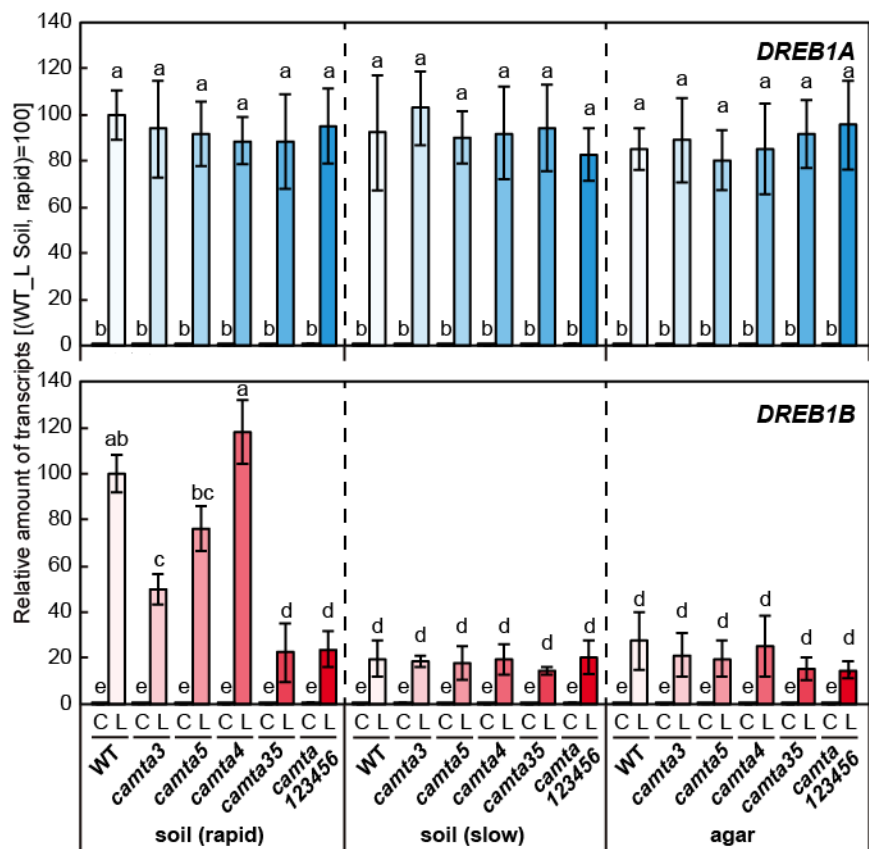

**Supplemental Figure 8.** Effects of cooling rates and growth conditions on cold-inducible expression of the *DREB1A* and *DREB1B* genes in various *camta* mutants.

(Supports Figure 5.)

WT and *camta* mutant plants grown in soil pots were subjected to two different cold treatments (rapid and slow), as described in Figure 5A. The plants grown on agar plates were immediately cooled to 4°C. All treatments were carried out for 3 h after the temperature began to decrease. The transcript levels of each gene in the plants before (C) and after (L) the cold treatments were measured by RT-qPCR. The values represent the average of three technical replicates, and the error bars indicate the SD. The maximum expression level of each gene in the WT plants grown in soil pots under the rapid cooling treatment was set to 100. The letters above the bars indicate significant differences ( $p < 0.01$  according to the Tukey–Kramer method) in the expression of each gene in three biological replicates using the plants sampled at different times.

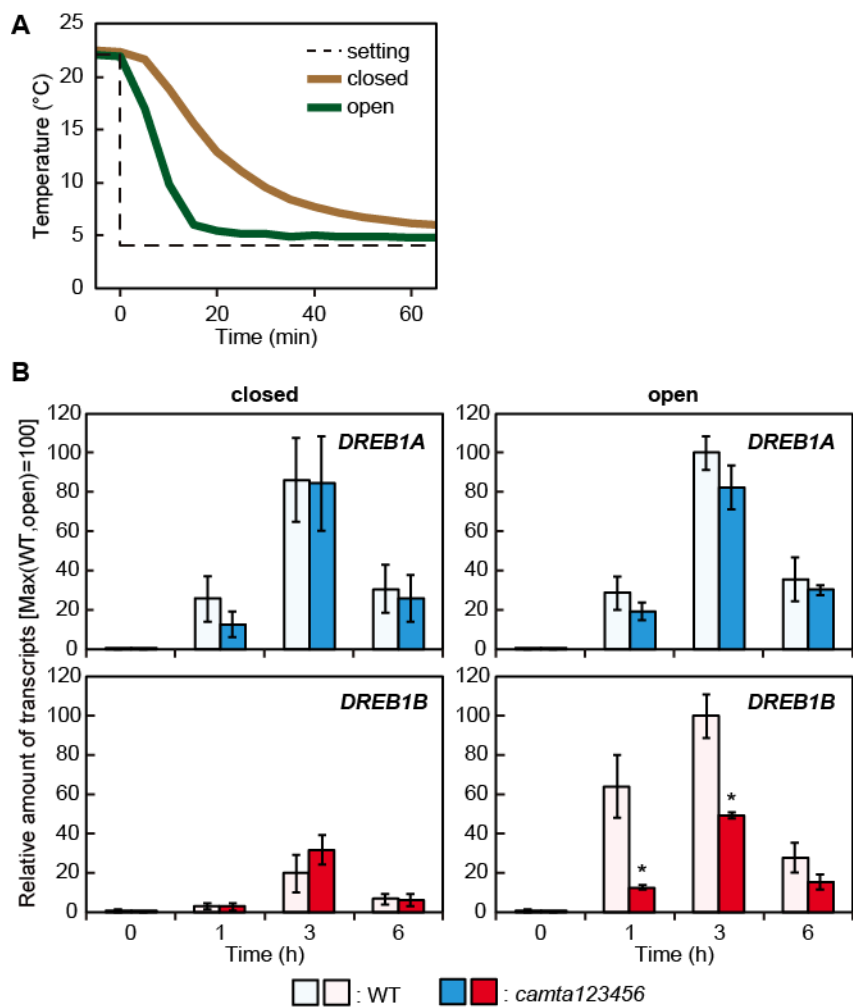

**Supplemental Figure 9.** Cold-inducible expression of the *DREB1A* and *DREB1B* genes in plants grown on agar plates with or without lids. (Supports Figure 5.)

**(A)** Temperatures around the plants grown on agar plates with or without lids.

**(B)** Expression levels of the *DREB1A* and *DREB1B* genes in response to cold stress in the plants grown on agar plates with or without lids. WT and *camta* sextuple mutant plants were grown on agar plates for three weeks. Then, they were immediately cooled to 4°C beginning at ZT2 with or without lids. The transcript level of each gene in the plants treated for the indicated duration (0, 1, 3, or 6 h) was measured by RT-qPCR. The values represent the average of three technical replicates, and the error bars indicate the SD. The maximum expression of each gene in the WT plants treated at 4°C without lids was set to 100. The asterisks indicate significant differences ( $p < 0.01$  according to Student's t-test) in the expression of each gene compared with that in the WT plants at each time point in three biological replicates using the plants sampled at different times.

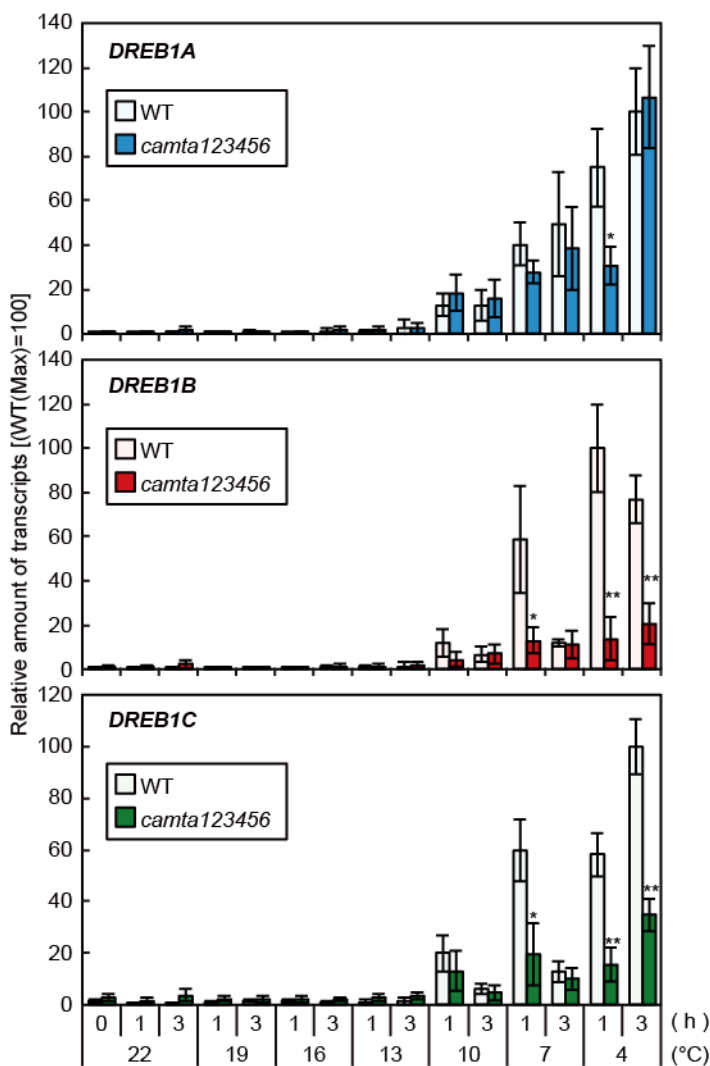

**Supplemental Figure 10.** Cold-inducible expression of the *DREB1* genes in plants grown in soil pots at various temperatures. (Supports Figure 5.)

WT and *camta* sextuple mutant plants grown in soil pots were immediately treated at each temperature. The transcript level of each gene in the plants treated for the indicated duration (0, 1, or 3 h) beginning at ZT2 was measured by RT-PCR. The values represent the average of three technical replicates, and the error bars indicate the SD. The maximum expression level of each gene in the WT plants was set to 100. The asterisks indicate significant differences ( $*p < 0.05$  and  $**p < 0.01$  according to Student's t-test) in the expression of each gene compared with that in the WT plants at each time point in three biological replicates using the plants sampled at different times.

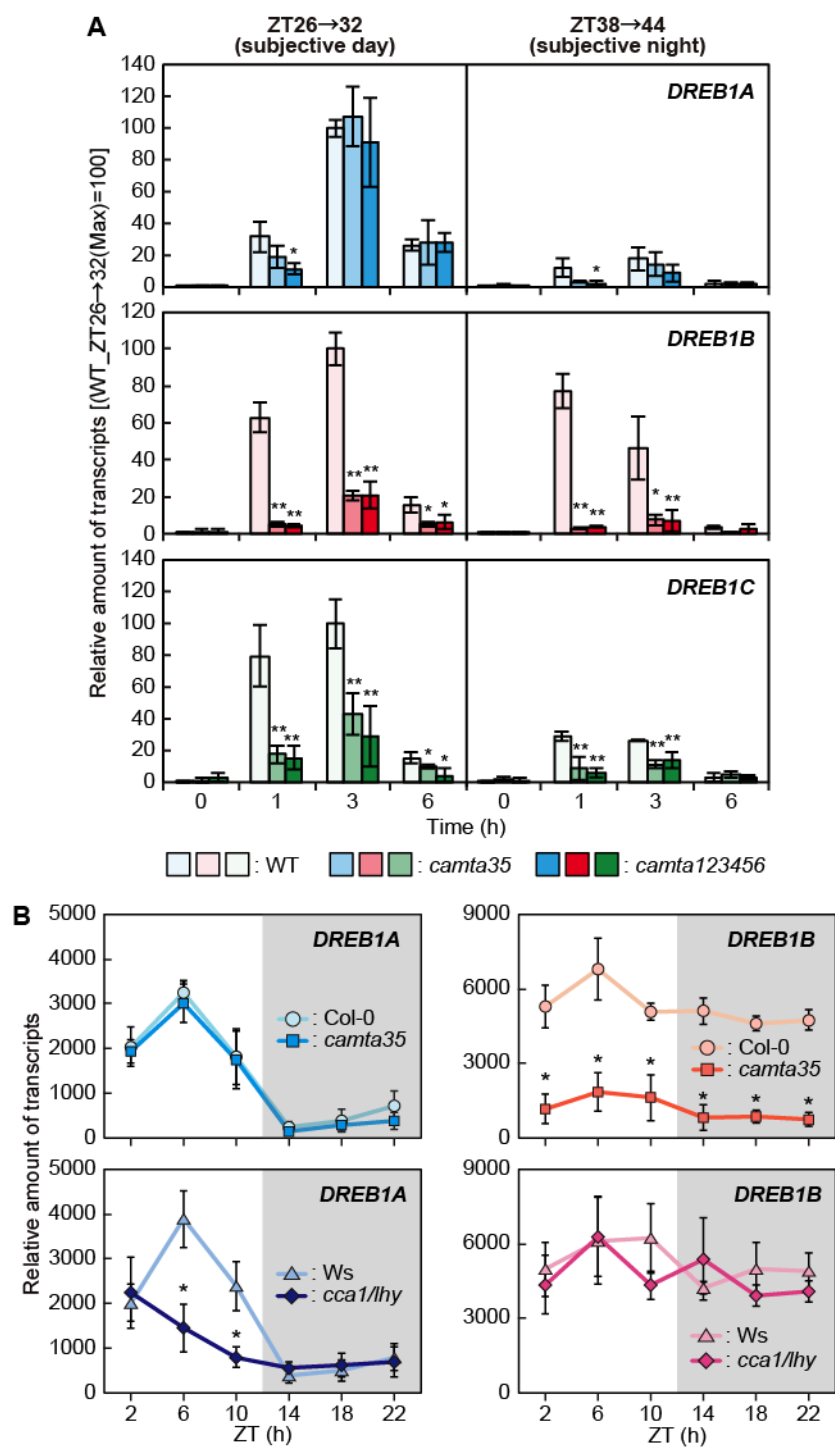

**Supplemental Figure 11.** Effects of the diurnal cycle and circadian clock on cold-inducible expression of the *DREB1* genes. (Supports Figure 6.)

**Supplemental Figure 11.** (continued)

**(A)** Expression of the *DREB1* genes in response to a rapid temperature decrease under circadian conditions. Three-week-old plants grown in soil pots under a 12-h light/12-h dark cycle at 22°C were transferred to free-running conditions under continuous light. Then, the plants were immediately cooled to 4°C beginning at Zeitgeber time 26 h (ZT26) or ZT38. The transcript level of each gene in the plants treated for the indicated duration (0, 1, 3, or 6 h) was measured by RT-PCR. The values represent the average of three technical replicates, and the error bars indicate the SD. The maximum expression level of each gene in the WT plants treated at 4°C beginning at ZT26 was set to 100. The asterisks indicate significant differences (\* $p < 0.05$  and \*\* $p < 0.01$  according to Student's t-test) in expression at each time point compared with that in the WT in three biological replicates using the plants sampled at different times.

**(B)** Effects of the diurnal cycle on expression of the *DREB1A* and *DREB1B* genes in response to a rapid temperature decrease. Three-week-old plants grown in soil pots under a 12-h light/12-h dark cycle at 22°C were immediately cooled to 4°C for 1 h, every 4 h from ZT2 to ZT22. Several plants were treated and harvested at each time point. The values represent the average of three technical replicates, and the error bars indicate the SD. The transcript levels in the WT plants (Col-0 or Ws) before the cold treatment at ZT2 were set to 1. The asterisks indicate significant differences ( $p < 0.01$  according to Student's t-test), in expression at each time point compared with that in the WT plants in three biological replicates using the plants sampled at different times.

**Supplemental Table 1.** The results of yeast one-hybrid screens  
(Supports Figure 1.)

| Locus     | Description | DNA binding domain | No. |
|-----------|-------------|--------------------|-----|
| At5g64220 | CAMTA2      | CG1                | 15  |
| At1g22190 | WIND2       | AP2                | 1   |
| At1g29860 | WRKY71      | WRKY               | 1   |
| At2g02450 | LOV1        | NAM                | 1   |
| At2g22120 |             | zinc finger        | 1   |
| At3g18650 | AGL103      | MADS-box           | 1   |
| At3g19860 | bHLH121     | bHLH               | 1   |
| At3g24140 | FMA         | bHLH               | 1   |
| At5g10140 | FLC         | MADS-box           | 1   |
| At5g22570 | WRKY38      | WRKY               | 1   |
| At5g59820 | ZAT12       | zinc finger        | 1   |
|           |             |                    | 25  |

**Supplemental Table 2.** Enriched hexamers in the promoters of the genes downstream of of the CAMTA family genes.  
(Supports Figure 3.)

|      | Sequence | List100 | Random100 |      | Fold | Z-score | p-value | q-value |
|------|----------|---------|-----------|------|------|---------|---------|---------|
|      |          |         | Mean100   | SD   |      |         |         |         |
| UP   | ACGACT   | 29      | 11.0      | 3.4  | 2.6  | 5.3     | 7.5E-08 | 3.1E-04 |
|      | AGTCGT   | 26      | 11.1      | 3.3  | 2.3  | 4.6     | 2.7E-06 | 4.1E-03 |
|      | AAAGTC   | 68      | 38.1      | 6.6  | 1.8  | 4.5     | 3.0E-06 | 4.1E-03 |
|      | GTCGTC   | 29      | 12.3      | 3.9  | 2.4  | 4.3     | 6.9E-06 | 7.0E-03 |
|      | TTCAAA   | 145     | 102.8     | 10.5 | 1.4  | 4.0     | 3.0E-05 | 2.4E-02 |
|      | ATGACG   | 27      | 12.6      | 3.6  | 2.1  | 4.0     | 3.5E-05 | 2.4E-02 |
|      | AGACCG   | 18      | 7.3       | 2.8  | 2.5  | 3.8     | 6.4E-05 | 3.7E-02 |
|      | GGTCAA   | 42      | 23.0      | 5.0  | 1.8  | 3.8     | 7.2E-05 | 3.7E-02 |
|      | TCAAAA   | 160     | 117.7     | 11.3 | 1.4  | 3.7     | 9.1E-05 | 3.9E-02 |
|      | CGACTT   | 25      | 12.0      | 3.5  | 2.1  | 3.7     | 9.5E-05 | 3.9E-02 |
|      | CACGCG   | 15      | 4.9       | 2.3  | 3.1  | 4.4     | 4.5E-06 | 1.9E-02 |
|      | ACGCGC   | 12      | 3.6       | 2.0  | 3.3  | 4.3     | 1.0E-05 | 2.1E-02 |
|      | TTACGC   | 18      | 7.2       | 2.7  | 2.5  | 4.1     | 2.5E-05 | 2.3E-02 |
|      | CCTATC   | 23      | 10.0      | 3.2  | 2.3  | 4.0     | 2.8E-05 | 2.3E-02 |
| DOWN | CACGTG   | 40      | 19.8      | 5.0  | 2.0  | 4.0     | 2.8E-05 | 2.3E-02 |
|      | CAAATA   | 114     | 77.9      | 9.7  | 1.5  | 3.7     | 9.6E-05 | 6.0E-02 |
|      | AAAAAC   | 186     | 137.8     | 13.0 | 1.3  | 3.7     | 1.0E-04 | 6.0E-02 |
|      | CGCCAC   | 17      | 6.7       | 2.8  | 2.5  | 3.7     | 1.3E-04 | 6.5E-02 |
|      | TCCACG   | 24      | 11.4      | 3.5  | 2.1  | 3.6     | 1.4E-04 | 6.5E-02 |
|      | CACGAT   | 24      | 11.5      | 3.5  | 2.1  | 3.6     | 1.6E-04 | 6.6E-02 |

Red and blue letters indicated core sequence of W-box (5'-TGAC-3') and CGCG-box (5'-(A/C/G)CGCG(G/T/C)-3'), respectively.

Supplemental Table 3. Primers used in this study

| Primer Name              | Sequence                        | Primer Name               | Sequence                  |
|--------------------------|---------------------------------|---------------------------|---------------------------|
| <b>T-DNA insertion</b>   |                                 |                           |                           |
| CAMTA1_LP                | GAAAGTGACCATTTCATCCACC          | CAMTA1_qRT_F              | GCCTTCTAATACTGACTCAATGCTG |
| CAMTA1_RP                | AAGGAAATGGACTTGATTGCC           | CAMTA1_qRT_R              | TAACGCCAGATCAGTGTCTATCC   |
| CAMTA2_LP                | TTTCAAAGAACCAACATTCATG          | CAMTA2_qRT_F              | GCAACAAAAATCCTGAACCTCAA   |
| CAMTA2_RP                | ACCTTGAAACCAATTCCTTGG           | CAMTA2_qRT_R              | GTTACTTCCTTTGACCCTGTTCC   |
| CAMTA3_LP                | CTATGAGTGAACCAATTATCC           | CAMTA3_qRT_F              | GCAACAGGAGGAAACCTTACTGG   |
| CAMTA3_RP                | CAGTGAGCATGAAGTGCTGG            | CAMTA3_qRT_R              | GTTACGGGGATTGTGCGAAG      |
| CAMTA4_LP                | GATGCCCTGAAGCTATAAGG            | CAMTA4_qRT_F              | GCCGAATACCATTCTAGCAATCTC  |
| CAMTA4_RP                | GTTGACCAATGTATGTTATC            | CAMTA4_qRT_R              | ATGCCTCCAACACATCTTTCC     |
| CAMTA5_LP                | GCTCTAGAGCTCTCCTCCGTAGC         | CAMTA5_qRT_F              | TCGTA CTCAAGTTCGATCACTGAC |
| CAMTA5_RP                | CTACTAAGGAATTCCTCGGCG           | CAMTA5_qRT_R              | AGACTGTTGCTCCGCACTTC      |
| CAMTA6_LP                | CTGCAAGAGCATCCTTGAGAC           | CAMTA6_qRT_F              | CTGGATAAGGCTCGAGAGAACATC  |
| CAMTA6_RP                | GCTTAACGATGGTCCACAAAG           | CAMTA6_qRT_R              | CGAGACGGAGATTGGACTAGAGA   |
| LBb1.3                   | ATTTTGCCGATTCGGAAC              | DREB1A_qRT_F              | CGCTGACTCGGCTTGGA         |
| <b>plasmid construct</b> |                                 |                           |                           |
| CAMTA1pro_F_KpnI         | GGGGTACCCTCGTAATTGGCCC          | DREB1A_qRT_R              | GCATCACACATCTCATCCTGAAAC  |
| CAMTA1pro_R_XbaI         | GCTCTAGAGATGGATAAACCCAAAAATC    | DREB1B_qRT_F(Ws&cca1/lhy) | GAGACGTGTGATACGACGACCA    |
| CAMTA2pro_F_KpnI         | GGGGTACCACGAATCAACGTTTC         | DREB1B_qRT_R(Ws&cca1/lhy) | GCATCCCAAACATTGTCTCC      |
| CAMTA2pro_R_XbaI         | GCTCTAGAGGAACATAAAACC           | DREB1B_qRT-F              | AGTCAACATGCGCCAAGGAT      |
| CAMTA3pro_F_KpnI         | GGGGTACCAGATGTATCTTTGTCTGATGAAC | DREB1B_qRT_R              | ATGTCCAGGCCATGATTCTG      |
| CAMTA3pro_R_XbaI         | GCTCTAGAGATATTGCTTTCTC          | DREB1C_qRT_F              | TGACGTGTCTTATGAGACTA      |
| CAMTA4pro_F_HindIII      | GGGAAGCTTAATTTGGGAAACATTGTG     | DREB1C_qRT_R              | CTGCACTCAAAAACATTTGCA     |
| CAMTA4pro_R_XbaI         | GCTCTAGACTGAGAAGAAGAAAAAACG     | GolS3_qRT_F               | ACAGGCCAAGAAGGAAATATGG    |
| CAMTA5pro_F_HindIII      | GGGAAGCTTAATAAATCTTATTTCTCC     | GolS3_qRT_R               | GATGGAGCTTTGGCACATTG      |
| CAMTA5pro_R_XbaI         | GCTCTAGACATCTCCGGTTTCAGATAC     | COR15A_qRT_F              | GAAAAAAACAGTGAAACCGCAGAT  |
| CAMTA6pro_F_KpnI         | CGGGGTACCCTGTCCAAAAATGATTCC     | COR15A_qRT_R              | CCACATACGCCGCGAGCTT       |
| CAMTA6pro_R_XbaI         | GCTCTAGACATCGTGATTTTCACTCTCG    | RD17_qRT_F                | CAGTGTGCGAGAGTGTGGTG      |
| CAMTA1_F_XbaI            | GCTCTAGAAATGGTGGATCGCAGATCTTTTG | RD17_qRT_R                | ACAGCTGGTGAATCCTCTGC      |
| CAMTA1_R_SmaI            | TCCCCCGGGTCAAGGAGAAATAGACATC    | COR15B_qRT_F              | CCACAACGTAGGAGCAAAGCA     |
| CAMTA2_F_XbaI            | GCTCTAGAAATGGCGGATCGCGGATCTTTC  | COR15B_qRT_R              | TTCTTGCGCTGAGCAACGA       |
| CAMTA2_R_SmaI            | TCCCCCGGGTCATTCAAATGCAAGAGACATG | KIN2_qRT_F                | CTGGCAAAGCTGAGGAGAAG      |
| CAMTA2_R-3_SmaI          | TCCCCCGGGTTCAAATGCAAGAGACATG    | KIN2_qRT_R                | ACTGCCGCATCCGATATACT      |
| CAMTA3_F_XbaI            | GCTCTAGAAATGGCGGAAGCAAGACGATTC  | EDS1_qRT_F                | CGAAGGGGACATAGATTGGA      |
| CAMTA3_R_SmaI            | TCCCCCGGGTTAACTGGTCCACAAAGATG   | EDS1_qRT_R                | CGTAGCCTCTCTGAGCATATATG   |
| CAMTA3_CG-1_R_SmaI       | TCCCCCGGGTCCATCCATGTCCCTC       | ICS1_qRT_F                | TATCTCCGGCAGCCGCCACT      |
| CAMTA3_R-3_SmaI          | TCCCCCGGGACTGGTCCACAAAGATGAGG   | ICS1_qRT_R                | ACGCCGAGGAAAAACGACGG      |
| CAMTA4_F_SmaI            | TCCCCCGGGATGGAATATGAATTAGTAC    | PR1_qRT_F                 | TGATCCTCGTGGGAATTATGT     |
| CAMTA4_R_SmaI            | TCCCCCGGGTTGGTAACCTCGCACATGAG   | PR1_qRT_R                 | TGCATGATCACATCATTACTTCAT  |
| CAMTA5_F_EcoRV           | GGGGATATCATGGCCGGCGTTGATTCCGGC  | XTH31_qRT_F               | AGAGACCATACCCAAACACCAGA   |
| CAMTA5_R_EcoRV           | GGGGATATCTCAGCTCTCCTCCGTAGCC    | XTH31_qRT_R               | CCCGTCACAAGACCTCCAA       |
| CAMTA5_CG-1_R_SmaI       | TCCCCCGGGTGAGTACGAGTTCCAG       | 18S rRNA_qRT_F            | AAACGGCTACCACATCCAAAG     |
| CAMTA5_R-3_EcoRV         | GGGGATATCGCTCTCTCCGTAGCC        | 18S rRNA_qRT_R            | CCTCCAATGGATCCTCGTTA      |
| CAMTA6_F_SmaI            | TCCCCCGGGATGGACGGCGACGGTTAGGC   | <b>RT-PCR</b>             |                           |
| CAMTA6_R_SmaI            | TCCCCCGGGCTACAGATCTCTCGAGCC     | CAMTA1_F                  | ATGGTGGATCGCAGATCTTTTG    |
| <b>EMSA</b>              |                                 |                           |                           |
| DREB1Apro_WT_F_XbaI      | GCTCTAGACGCTGTGTATAGTTAC        | CAMTA1_R                  | GTGAAACATTACGCATGCCAG     |
| DREB1Apro_WT_R_XbaI      | GCTCTAGAAACGGATATGTGGGGAG       | CAMTA2_F                  | ATGGCGGATCGCGGATCTTTC     |
| DREB1Bpro_WT_F_XbaI      | GCTCTAGACGCTATGTACTATAC         | CAMTA2_R                  | GATTGCATCTGCAAGTCTTC      |
| DREB1Bpro_WT_R_XbaI      | GCTCTAGAACGGATATGTGGGGAG        | CAMTA3_F                  | = CAMTA3_RP               |
| DREB1Cpro_WT_F_XbaI      | GCTCTAGAGCTGTTTCTTATCCAC        | CAMTA3_R                  | TTAAGTGGTCCACAAAGATG      |
| DREB1Cpro_WT_R_XbaI      | GCTCTAGAGGATATTTGTGGGGTC        | CAMTA4_F                  | GTTGACCAATCTACATTTTGTTG   |
|                          |                                 | CAMTA4_R                  | TTGGTAACCTCGCACATGAG      |
|                          |                                 | CAMTA5_F                  | = CAMTA5_RP               |
|                          |                                 | CAMTA5_R                  | TCAGCTCTCCTCCGTAGCC       |
|                          |                                 | CAMTA6_F                  | = CAMTA6_RP               |
|                          |                                 | CAMTA6_R                  | CTACAGATCTCTCGAGCC        |
|                          |                                 | Act2_F                    | GGAAGGATCTGTACGGTAAC      |
|                          |                                 | Act2_R                    | TGTGAACCATTCCTGGAC        |

An underline indicates a restriction site.
